# Supplementary material for: A novel allele of L-galactono-1,4-lactone dehydrogenase is associated with enhanced drought tolerance through affecting stomatal aperture in common wheat
Source: PubMed Central journal article supplement (PMC4957090; doi:10.1038/srep30177), 2016-07-22
Supplement: srep30177-s1.pdf [file srep30177-s1.pdf]

# **A novel allele of L-galactono-1,4-lactone dehydrogenase is associated with enhanced drought tolerance through affecting stomatal aperture in common wheat**

Juncheng Zhang<sup>1, +</sup>, Bin Li<sup>1,2,3, +</sup>, Yanping Yang<sup>1,2</sup>, Peiyuan Mu<sup>4</sup>,  
Weiqiang Qian<sup>1,2</sup>, Lingli Dong<sup>1</sup>, Kunpu Zhang<sup>1</sup>, Xin Liu<sup>1</sup>, Huanju Qin<sup>1</sup>,  
Hongqing Ling<sup>1</sup> & Daowen Wang<sup>1,5\*</sup>

<sup>1</sup>The State Key Laboratory of Plant Cell and Chromosome Engineering, Institute of Genetics and Developmental Biology, Chinese Academy of Sciences, Beijing 100101, China. <sup>2</sup>University of Chinese Academy of Sciences, Beijing 100049, China. <sup>3</sup>The National Key Facility for Crop Gene Resources and Genetic Improvement, Institute of Crop Science, Chinese Academy of Agricultural Sciences, Beijing 100081, China. <sup>4</sup>Institute of Crop Research, Xinjiang Academy of Agri-Reclamation Sciences, Shihezi 832000, China. <sup>5</sup>The Collaborative Innovation Center for Grain Crops, Henan Agricultural University, Zhengzhou 450002, China.

<sup>+</sup>The two authors contributed equally to this work.

Correspondence and request for materials should be addressed to D.W. (email [dwwang@genetics.ac.cn](mailto:dwwang@genetics.ac.cn)).

**Figure S1.** A diagram showing the positions of the different primer sets (PS1 to PS11) used in this work. The positions are relative to the genomic open reading frame of *TaGLDH-A1* (from start to stop codons). The green boxes represent exons. The nucleotide sequences of the primers are listed in Table S1.

**Figure S2.** Assigning *TaGLDH-A1*, *-B1* and *-D1* to wheat group 5 chromosomes 5A, 5B and 5D, respectively, through comparing the amplicons obtained with the primer sets PS3 or PS4 in Chinese Spring (CS) and derivative nulli-tetrasomic (NT) lines (N5AT5D, N5BT5A and N5DT5B). The amplicons (peaks) derived from *TaGLDH-A1*, *-B1* and *-D1* were separated by capillary electrophoresis. Those missed in the individual NT lines are indicated by arrows.

**Figure S3.** Recombinant pea early browning viruses (PEBVs) developed (a) and  $\beta$ -glucuronidase (GUS) signals generated by the infection of *N. benthamiana* plants with PEBV:GUS (b). Four T-DNA constructs (pCAPE2-GUS, pCAPE2-A1, pCAPE2-B1 and pCAPE2-D1) were prepared. Together with pCAPE1, they formed four recombinant PEBVs (PEBV:GUS, PEBV:A1, PEBV:B1 and PEBV:D1), respectively. PEBV:GUS was introduced into *N. benthamiana* plants through agroinfection, with the ectopically expressed GUS protein visualized by histochemical staining at two weeks post agroinfection. The blue precipitates in (b) indicate GUS protein expression. CP, coat protein; LB, left border; RB, right border; T, NOS terminator; 35S, 35S promoter.

**Figure S4.** Recombinant barley stripe mosaic viruses (BSMV) developed (a), green fluorescence protein (GFP) signals produced by BSMV:GFP (b), and leaf bleaching phenotype generated by BSMV:PDSas (c). Three  $\gamma$  clones ( $\gamma$ -GFP,  $\gamma$ -TaPDSas and  $\gamma$ -TaGLDHAs) were used in this work. When combined with the  $\alpha$  and  $\beta$  clones, three

recombinant BSMVs (BSMV:GFP, BSMV: PDSas and BSMV:GLDHAs) were reconstituted. At two weeks after virus inoculation of Xiaoyan 54 seedlings, GFP signals were detected in the leaf tissues infected by BSMV:GFP but not in those of uninoculated control under fluorescent microscopy; strong photo-bleaching was found in the leaves infected by BSMV:PDSas but not in those of uninoculated control or infected by BSMV:GFP. The two *NheI* restriction enzyme digestion sites were used to clone foreign insert into the original  $\gamma$  clone.  $\alpha$ a,  $\beta$ a,  $\beta$ b,  $\beta$ c,  $\beta$ d,  $\gamma$ a and  $\gamma$ b are BSMV open reading frames.

**Figure S5.** Stimulation of AsA biosynthesis by exogenous supply of 15 mM L-galactono-1,4-lactone (L-GalL). The leaves collected from mock controls and the plants infected by BSMV:GFP or BSMV:GLDHAs were treated with 15 mM L-GalL or distilled water (dd H<sub>2</sub>O), followed by measurement of total AsA (a) and reduced AsA (b) contents. Each value ( $\pm$  SD) is the mean of three independent measurements (for three plants). The values marked by different letters are statistically significant ( $P \leq 0.05$ ).

**Figure S6.** Detection of *TaGLDH-A1a* and *TaGLDH-A1b* alleles in common wheat germplasm lines by examining PCR fragments amplified with the primer sets PS3 or PS4. *TaGLDH-A1a* was detected in Xiaoyan 54 and Chinese Spring (CS), whereas *TaGLDH-A1b* was found in Hongdongmai, Kashi 1, Kashibaipi and Tutoumai. The fragment derived from *TaGLDH-A1b* (452 bp) was 3 bp shorter than that from *TaGLDH-A1a* (455 bp). The six varieties did not differ in the size of the remaining five fragments.

**Figure S7.** Development and application of a cleaved amplified polymorphic marker CAP-A1b for differentiating *TaGLDH-A1b* from its wild type allele *TaGLDH-A1a*. (a)

The polymorphism pattern generated by CAP-A1b with the PCR amplicons from two varieties (Kashibaipi and Xinchun 3) carrying *TaGLDH-A1b* and another two lines (Xiaoyan 54 and Yichun 4) with *TaGLDH-A1a*. After digestion with *Bsa*II, the amplicons of *TaGLDH-A1a* were cleaved into two fragments of 266 and 272 bp, respectively, whereas those of *TaGLDH-A1b* remained intact. The size (bp) of the DNA marker is shown on the left side of the graph. (b) Application of CAP-A1b in genotyping the individuals in a F<sub>2</sub> population prepared by crossing Yichun 4 (*TaGLDH-A1a*) with Xinchun 3 (*TaGLDH-A1b*). This marker allowed the identification of the F<sub>2</sub> individuals homozygous for *TaGLDH-A1a* (blue) or *TaGLDH-A1b* (red) and those segregating for *TaGLDH-A1a* and *TaGLDH-A1b* (green).

**Figure S8.** AsA contents in the leaf (a) and root (b) tissues of the wheat landrace Kashibaipi (carrying the allele *TaGLDH-A1b*) before and after water deficiency treatment using 13% polyethylene glycol 6000 (PEG 6000). The plants used in this test were three weeks old. After being subjected to PEG 6000 treatment for the indicated times, the leaf and root samples were collected for measuring the contents of reduced AsA and oxidized AsA. Each value ( $\pm$  SD) was the mean of three independent measurements (using the samples from three different plants).

**Table S1.** Primer sets used in this study.

**Table S2.** List of 11 common wheat cultivars from Xinjiang and their allelic status at *TaGLDH-A1* locus.

**Table S3.** Abiotic stress tolerance, cultivation history and pedigree (origin) information for the seven common wheat cultivars carrying *TaGLDH-A1b*.

**Figure S1**

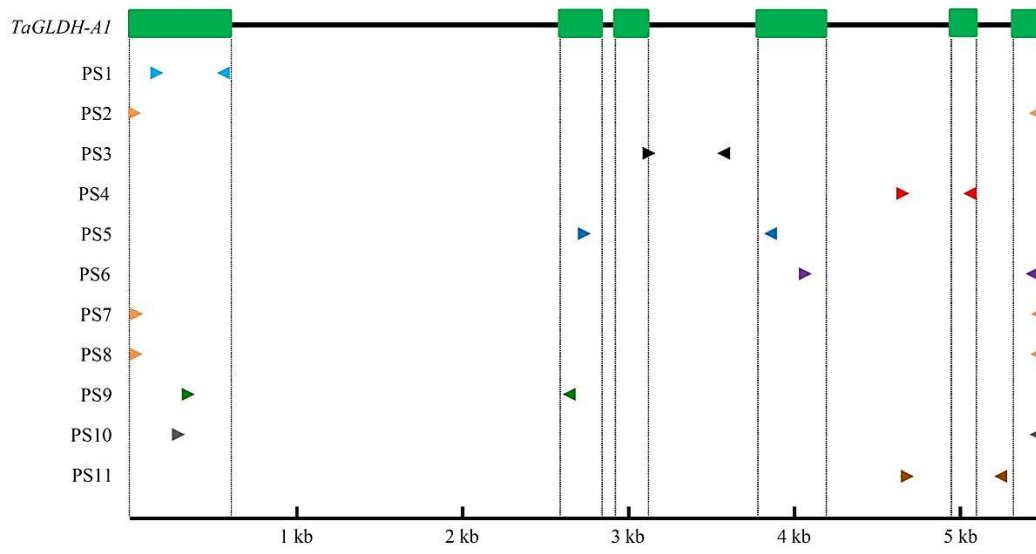

**Figure S2**

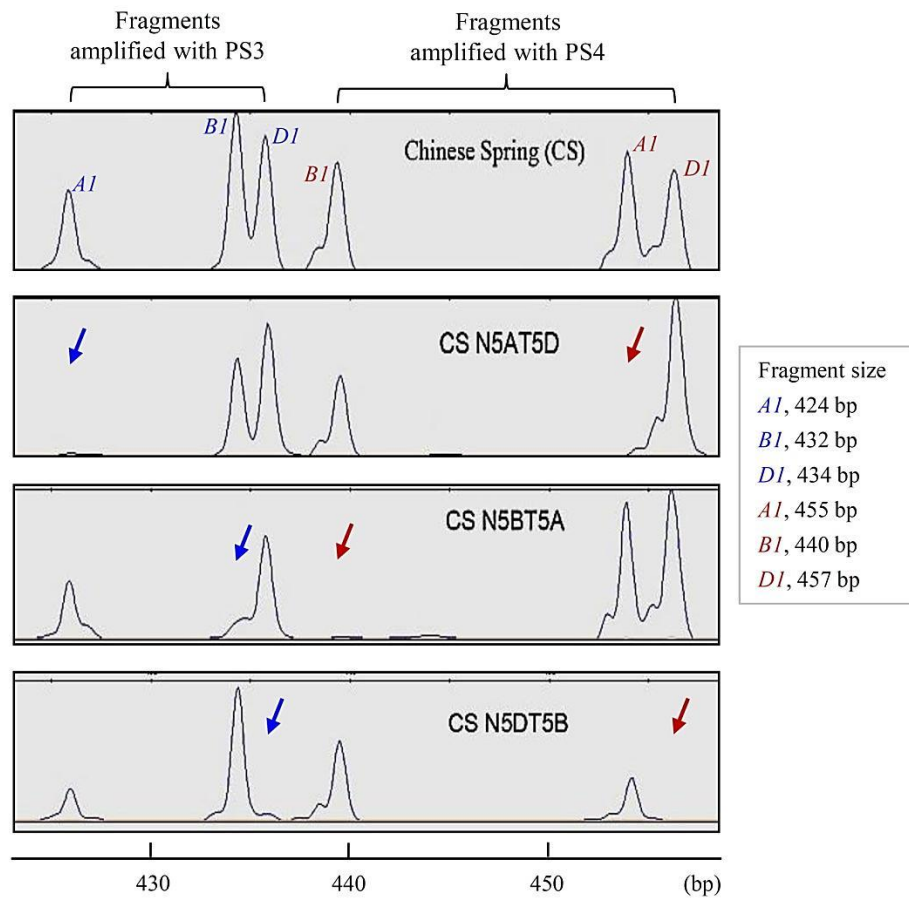

**Figure S3**

**(a)**

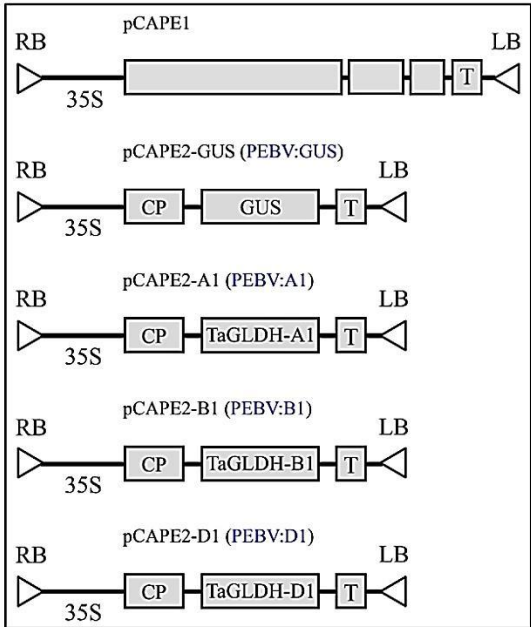

**(b)**

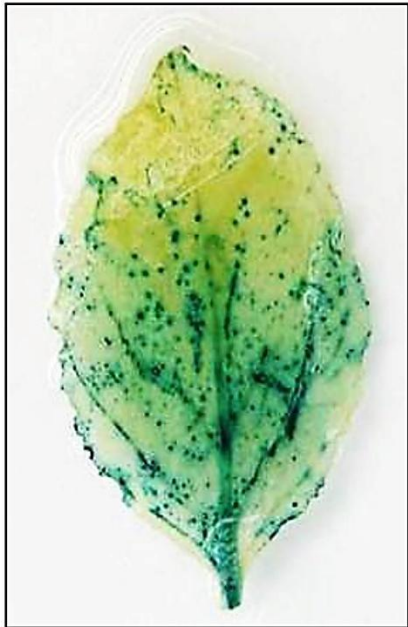

Figure S4

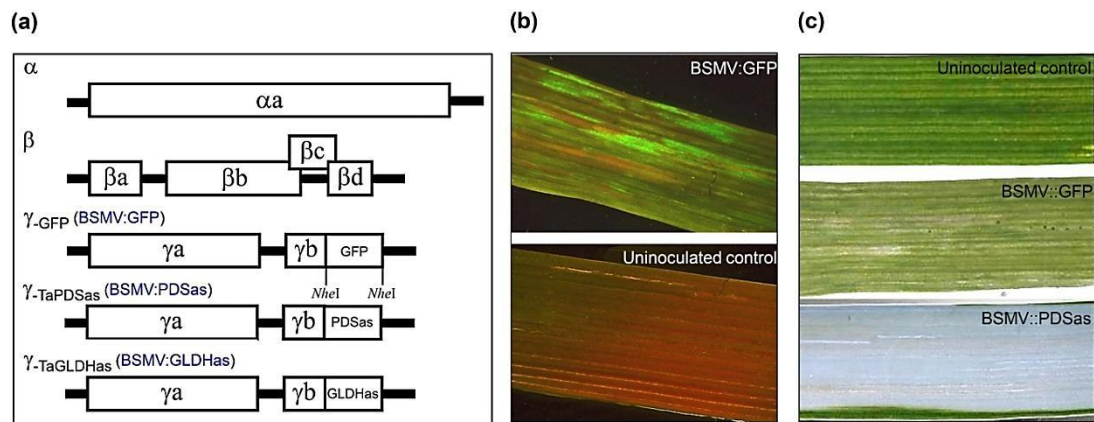



Figure S5

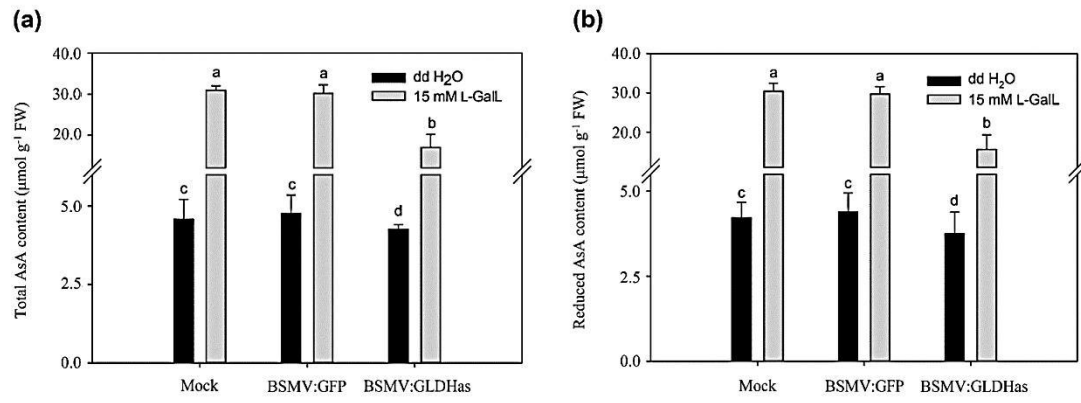

**Figure S6**

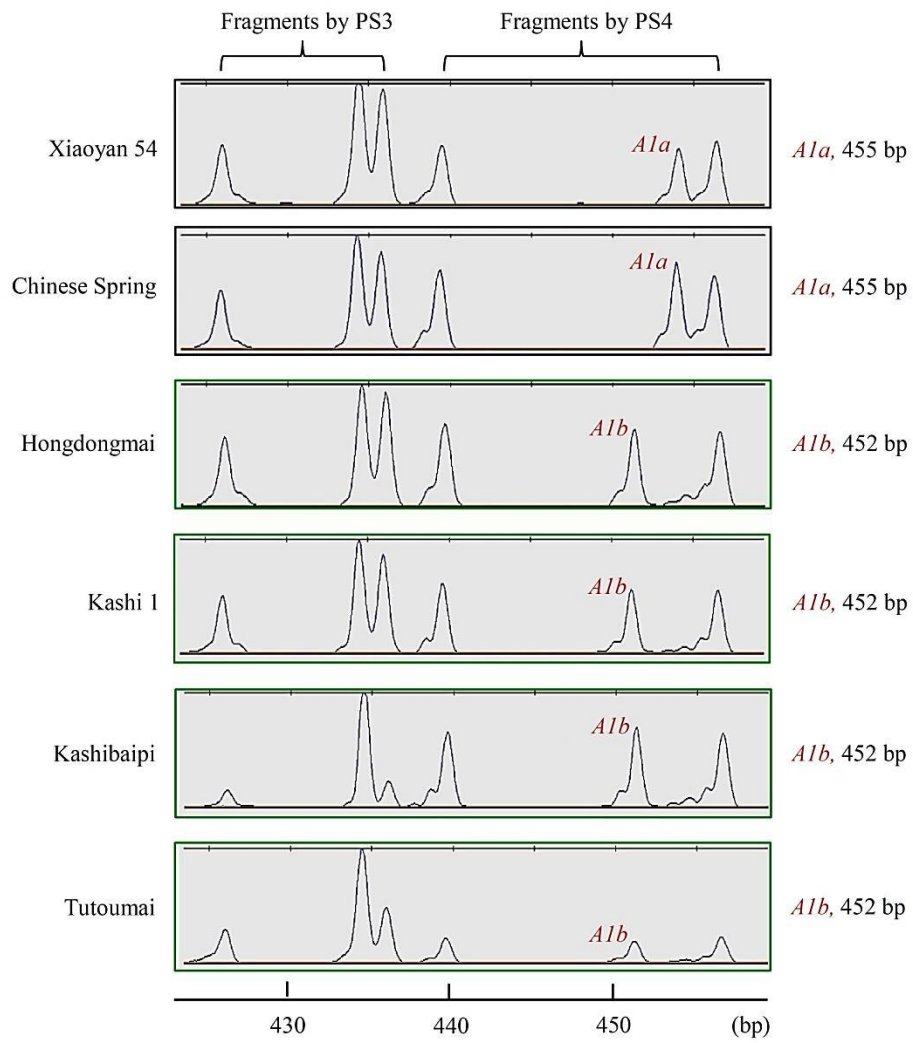

Figure S7

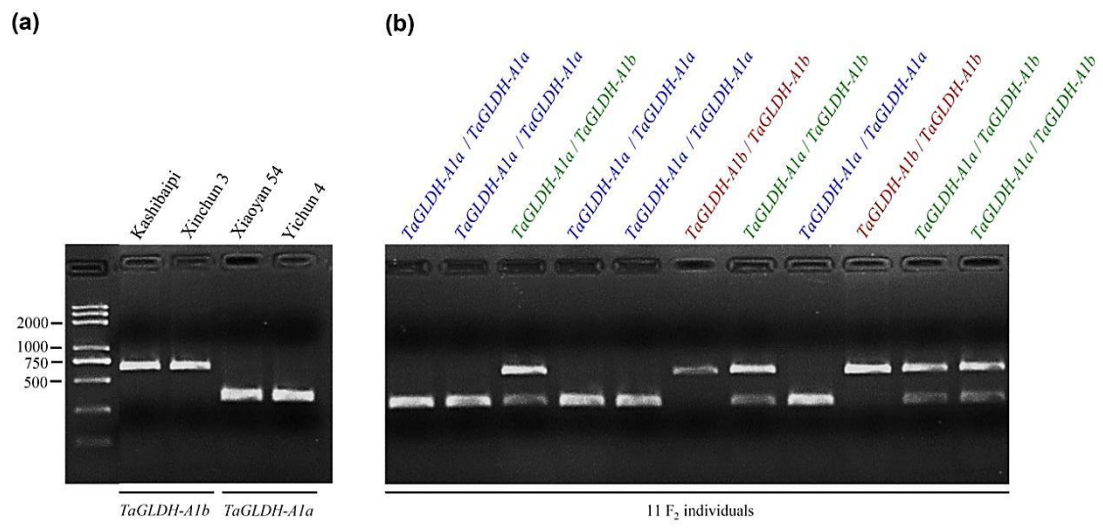

**Figure S8**

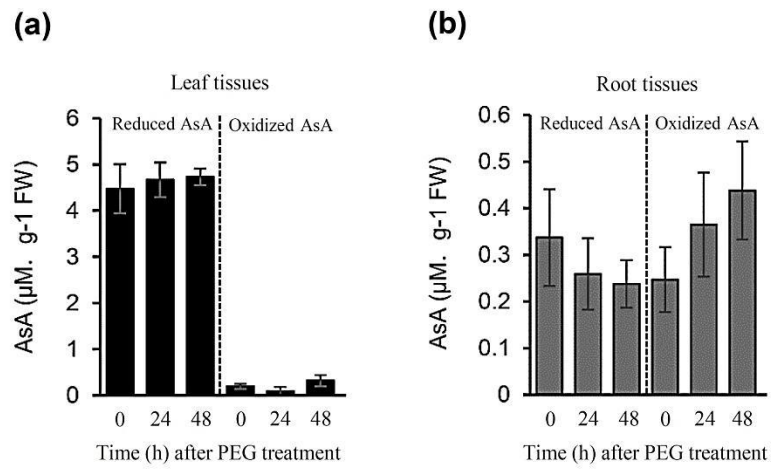

**Table S1.** Primer sets used in this study.

| Primer set                                    | Sequence (5' - 3') <sup>a</sup>                                                                                   | Amplicon length (bp)                                                                      | Use                                                                                                                                                        |
|-----------------------------------------------|-------------------------------------------------------------------------------------------------------------------|-------------------------------------------------------------------------------------------|------------------------------------------------------------------------------------------------------------------------------------------------------------|
| PS1                                           | F: TCCACAAGAAGGCCGTCCCTTC<br>R: ACCTGAATGATGCCGCCGACCTGC                                                          | 378<br>(Genomic DNA)                                                                      | Screening Xiaoyan 54 BAC library                                                                                                                           |
| PS2                                           | F: ATGCGGCACCTCCTCCTCTCCCGTC<br>R: TTACC(T)TTGCATGTTGGACAGTCTG                                                    | 5498 - 5685<br>(Genomic DNA)<br><br>1755 bp (cDNA)                                        | 1) Amplifying full-length <i>TaGLDH</i> ORFs from positive BAC clones<br>2) Cloning the cDNA coding region of <i>TaGLDH-A1</i> , <i>-B1</i> and <i>-D1</i> |
| PS3                                           | F: GAGTCATTGAAGAAATATAGGTGCG<br>R: GCGACTCTTCCTACAAACATCAC                                                        | 424 ( <i>A1</i> ) <sup>b</sup><br>432 ( <i>B1</i> )<br>434 ( <i>D1</i> )<br>(Genomic DNA) | Assigning <i>TaGLDH</i> homoeologs to wheat chromosomes                                                                                                    |
| PS4                                           | F: CCCTGTATAACTCAGTTCAAACCTGTG<br>R: GCAGAATAATCATCCCAGAGACTAG                                                    | 455 ( <i>A1</i> )<br>440 ( <i>B1</i> )<br>457 ( <i>D1</i> )<br>(Genomic DNA)              | Assigning <i>TaGLDH</i> homoeologs to wheat chromosomes                                                                                                    |
| PS5                                           | F: CTTGCC(T)CGCTGTGGACTTG<br>R: TCTATCGCTGGGTCTTTACTGTGC                                                          | 341 (cDNA)                                                                                | Measuring <i>TaGLDH</i> expression by qRT-PCR                                                                                                              |
| PS6                                           | F: CCTACAGGAACTCTAGCGAAGC<br>R: AACTTGGCACTGGAGAGAACC                                                             | 446 (cDNA)                                                                                | Measuring <i>TaGLDH</i> expression by semi-quantitative RT-PCR                                                                                             |
| PS7                                           | F: <u>CTGAGCTC</u> ATGCGGCACCTCCTCCTC<br>R: <u>CTGTCGACTT</u> ACCTTGCATGTTGGAC                                    | 1755 (cDNA)                                                                               | Cloning <i>TaGLDH-A1</i> into PEBV vector                                                                                                                  |
| PS8                                           | F: <u>CTGAGCTC</u> ATGCGGCACCTCCTCCTC<br>R: <u>CTGTCGACTT</u> ACTTTGCATGTTGGAC                                    | 1755 (cDNA)                                                                               | Cloning <i>TaGLDH-B1</i> or <i>D1</i> into PEBV vector                                                                                                     |
| PS9                                           | F: <u>CTGCTAGCC</u> ACACCCGCTCCAACCTG<br>R: <u>CTGCTAGCC</u> TTTGGCAGGAGTAACCAG                                   | 431 (cDNA)                                                                                | Constructing BSMV:GLDHas for VIGS                                                                                                                          |
| PS10                                          | F: <u>GTCATATG</u> TATGCACCTCTTCCTGACGA<br>CCTCCACAC <sup>c</sup><br>R: <u>CTGCGGCCGC</u> CTTTGCATGTTGGACAG<br>TC | 1521 (cDNA)                                                                               | Expressing <i>TaGLDH-A1a</i> and <i>-A1b</i> in bacterial cells                                                                                            |
| PS11                                          | F: AGTATTGGTAATAAATTAACAAC<br>R: CCATTTTGTCATAATAATGCTTT                                                          | 538 bp<br>( <i>TaGLDH-A1a</i> )<br>535 bp<br>( <i>TaGLDH-A1b</i> )<br>(Genomic DNA)       | Development of the CAP-A1b marker for identifying <i>TaGLDH-A1b</i>                                                                                        |
| PS12 (Wheat 26S rRNA gene) <sup>d</sup>       | F: GAAGAAGGTCCCAAGGGTTC<br>R: TCTCCCTTAAACCCAACGG                                                                 | 110 (cDNA)                                                                                | As internal reference for qRT-PCR                                                                                                                          |
| PS13 (Wheat beta-tubulin gene 2) <sup>e</sup> | F: GTGCATGGTCTTGACAACG<br>R: CCTTAGGCAGCAGGTGACTC                                                                 | 130 (cDNA)                                                                                | As internal reference for semi-quantitative RT-PCR                                                                                                         |

<sup>a</sup> The underlined nucleotides form the restriction enzyme digestion site for *SacI* (GAGCTC), *SalI* (GTCGAC), *NdeI* (CATATG), *NheI* (GCTAGC) or *NotI* (GCGGCCGC).

<sup>b</sup> *A1*, *B1* and *D1* denote *TaGLDH-A1*, *-B1* and *-D1* homoeologs, respectively.

<sup>c</sup> In this forward primer, the sequence downstream of the underlined ATG (the start codon for bacterial expression), i.e., TATGCACCTCTTCCTGACGACCTCCACAC, differed slightly from its target region in the coding sequence of *TaGLDH-A1a* and *A1b*, but still encoded the correct amino acid residues (YAPLPDDLH) upon translation. This modification reduced the GC content and facilitated the expression of *TaGLDH-A1a* and *A1b* in bacterial cells.

<sup>d</sup> The GenBank accession number for the wheat 26S rRNA gene is Z11889.

<sup>e</sup> The GenBank accession number for the wheat beta-tubulin gene 2 is U76745.

**Table S2.** List of 11 common wheat cultivars from Xinjiang and their allelic status at *TaGLDH-A1* locus.

| Cultivar    | <i>TaGLDH-A1</i> allele |
|-------------|-------------------------|
| Achun 2     | <i>TaGLDH-A1a</i>       |
| Changchun 3 | <i>TaGLDH-A1a</i>       |
| Dabaimai    | <i>TaGLDH-A1a</i>       |
| Jiuchun 1   | <i>TaGLDH-A1b</i>       |
| Jiuchun 2   | <i>TaGLDH-A1a</i>       |
| Qichun 5    | <i>TaGLDH-A1a</i>       |
| Redstar     | <i>TaGLDH-A1b</i>       |
| Tuchun 6    | <i>TaGLDH-A1a</i>       |
| Xinchun 2   | <i>TaGLDH-A1a</i>       |
| Xinchun 3   | <i>TaGLDH-A1b</i>       |
| Yichun 4    | <i>TaGLDH-A1a</i>       |

**Table S3.** Abiotic stress tolerance, cultivation history and pedigree (origin) information for the seven common wheat cultivars carrying *TaGLDH-A1b*.

| Cultivar    | Type             | Abiotic stress tolerance                               | Cultivation history | Pedigree (origin)                                                      |
|-------------|------------------|--------------------------------------------------------|---------------------|------------------------------------------------------------------------|
| Hongdongmai | Landrace         | Tolerance to drought, hot wind, salt and cold stresses | 1950s               | Local line                                                             |
| Kashi 1     | Improved variety | Tolerance to drought, salt and cold stresses           | 1970s               | Bacpuc × Heine Hvede                                                   |
| Kashibaipi  | Landrace         | Tolerance to drought, hot wind and salt stresses       | 1950s - 1970s       | Local line                                                             |
| Redstar     | Landrace         | Tolerance to drought and hot wind stresses             | 1960s - early 1980s | From former Soviet Union                                               |
| Totoumai    | Landrace         | Tolerance to drought and hot wind stresses             | 1950s - 1960s       | Local line                                                             |
| Jiuchun 1   | Improved variety | Tolerance to drought and hot wind stresses             | 1980s               | Honglema × 5-1-3                                                       |
| Xinchun 3   | Improved variety | Tolerance to drought stress                            | 1980s - 1990s       | Siete Cerros × Changchun 1 (Changchun 1 is a derivative of Kashibaipi) |

The information in this Table is derived from the following references.

Jin, S. B. *Chinese wheat varieties and their pedigrees*. (Beijing Agricultural Press, 1983).

Jin, S. B. *Chinese wheat varieties (1983-1993)*. (Beijing Agricultural Press, 1997).

He, Z. H., Rajaram, S., Xin, Z. Y. & Huang, G. Z. *A history of wheat breeding in China*. (CIMMYT, 2001).

Zhuang, Q. S. *Chinese wheat improvement and pedigree analysis*. (Beijing Agricultural Press, 2003).
